# Supplementary material
Source: MDPI journal article supplement (https://www.mdpi.com/search?q=plants-09-00106)
Supplement: s001 [file plants-09-00106-s001.pdf]

## Supplementary material 1

**Table S1. Species names and accession numbers for phylogeny.** Proteins marked with a cross were used for the ancestral sequence reconstruction.

|                       |                                   |                        | <b>Ancestral tree</b> |
|-----------------------|-----------------------------------|------------------------|-----------------------|
| <b>Archeplastida</b>  |                                   |                        |                       |
| Arabidopsis GOX2      | Arabidopsis thaliana              | AT3G14415              | x                     |
| Camelina              | Camelina sativa                   | XP_010501901.1         | x                     |
| Capsella              | Capsella rubella                  | XP_006297960.1         | x                     |
| Eutrema               | Eutrema salsugineum               | XP_006407078.1         | x                     |
| Brassica              | Brassica oleracea var. oleracea   | XP_013610435.1         | x                     |
| Cucurbita             | Cucurbita cv.                     | T10242                 | x                     |
| Glycine               | Glycine max                       | Glyma.08G097300.1      | x                     |
| Mimulus               | Mimulus gattatus                  | XP_012836481.1         | x                     |
| Populus               | Populus trichocarpa               | Potri.004G065200.1     | x                     |
| Zea                   | Zea mays                          | GRMZM5G853854_T04      | x                     |
| Selaginella           | Selaginella moellendorffii        | XP_002960597.1         |                       |
| Tarenaya              | Tarenaya hassleriana              | XP_010542340.1         | x                     |
| Physcomitrella        | Physcomitrella patens             | Phpat.019G012100.1     | x                     |
| Spirogyra             | Spirogyra pratensis               |                        | x                     |
| Nitella               | Nitella hyalina                   | HO568574,<br>HO568574; | x                     |
| Cyanidioschyzon       | Cyanidioschyzon merolae           | XP_005538305.1         | x                     |
| Galdieria             | Galdieria sulphuraria             | EME31839.1             | x                     |
| Cyanophora            | Cyanophora paradoxa               |                        | x                     |
| <b>Chlorophyta</b>    |                                   |                        |                       |
| Chlamydomonas         | Chlamydomonas reinhardtii         | Cre03.g171300.t1.2     |                       |
| Chlorella             | Chlorella sp. NC64A               | 139480                 |                       |
| Helicosporidium       | Helicosporidium sp. ATCC 50920    | KDD75237.1             |                       |
| Coccomyxa             | Coccomyxa sp.C-169                | 28454                  |                       |
| Volvox                | Volvox carteri nagariensis        | Vocar20007888m         |                       |
| <b>Chromalveolata</b> |                                   |                        |                       |
| Albugo c.             | Albugo candida                    | CCI41131.1             |                       |
| Albugo l.             | Albugo laibachii Nc14             | CCA27043.1             |                       |
| Aphanomyces i.        | Aphanomyces invadans              | XP_008863753.1         |                       |
| Aphanomyces a.        | Aphanomyces astaci                | XP_009824694.1         |                       |
| Saprolegnia p.        | Saprolegnia parasitica CBS 223.65 | XP_012195384.1         |                       |
| Saprolegnia d.        | Saprolegnia diclina VS20          | XP_008607053.1         |                       |
| Phytophthora s.       | Phytophthora sojae                | XP_009537350.1         |                       |
| Phytophthora P1569    | Phytophthora parasitica P1569     | ETI31031.1             |                       |
| Phytophthora INRA-310 | Phytophthora parasitica INRA-310  | XP_008915124.1         |                       |
| Phytophthora CJ01A1   | Phytophthora parasitica CJ01A1    | ETP00827.1             |                       |
| Phytophthora i.       | Phytophthora infestans T30-4      | XP_002904015.1         |                       |
| Ichthyophthirius      | Ichthyophthirius multifiliis      | XP_004030568.1         |                       |

|                 |                                    |                |
|-----------------|------------------------------------|----------------|
| Tetrahymena     | Tetrahymena thermophila SB210      | XP_001018684.1 |
| Paramecium      | Paramecium tetraurelia strain d4-2 | XP_001450828.1 |
| Oxytricha       | Oxytricha trifallax                | EJY79775.1     |
| Stylonychia     | Stylonychia lemnae                 | CDW90415.1     |
| Nannochloropsis | Nannochloropsis gaditana           | EWM20821.1     |
| Laminaria       | Laminaria digitata                 | CAB61335.1     |
| Ectocarpus      | Ectocarpus siliculosus             | CBJ25884.1     |

### Metazoa

|              |                          |                                          |
|--------------|--------------------------|------------------------------------------|
| Anolis       | Anolis carolinensis      | XP_003215389.1                           |
| Gallus       | Gallus gallus            | NP_001186371.2                           |
| Felis        | Felis catus              | XP_003983819.1                           |
| Dipodomys    | Dipodomys ordii          | XP_012866539.1                           |
| Ursus        | Ursus maritimus          | XP_008701559.1                           |
| Pongo        | Pongo abelii             | XP_002829994.1                           |
| Homo         | Homo sapiens             | ENST00000361035                          |
| Latimera     | Latimera chalumnae       | XP_006007815.1<br>ENSRNOT0000000<br>6330 |
| Rattus       | Rattus norvegicus        | XP_006813604.1                           |
| Saccoglossus | Saccoglossus kowalevskii | XP_006813604.1                           |
| Tribolium    | Tribolium castaneum      | XP_970519.1                              |

### Cyanobacteria

|                 |                           |                |   |
|-----------------|---------------------------|----------------|---|
| Nostoc 7524     | Nostoc sp. PCC 7524       | WP_015140379.1 | x |
| Cylindrospermum | Cylindrospermum stagnale  | WP_015205993.1 | x |
| Anabaena 7108   | Anabaena sp. PCC 7108     | WP_016953564.1 | x |
| Tolypothrix     | Tolypothrix sp. PCC 7601  | WP_045868031.1 | x |
| Anabaena 90     | Anabaena sp. 90           | WP_015080525.1 | x |
| Nostoc          | Nostoc sp. PCC 7120       | all0170        | x |
| Calothrix       | Calothrix sp. PCC 7507    | WP_015130234.1 | x |
| Trichodesmium   | Trichodesmium erythraeum  | WP_011611983.1 | x |
| Microcoleus     | Microcoleus sp. PCC 7113  | WP_015184688.1 | x |
| Scytonema       | Scytonema hofmanni        | WP_017741674.1 | x |
| Fischerella     | Fischerella muscicola     | WP_016861129.1 | x |
| Mastigocoleus   | Mastigocoleus testarum    | WP_027846885.1 | x |
| Chlorogloeopsis | Chlorogloeopsis fritschii | WP_016877915.1 | x |
| Anabaena        | Anabaena variabilis       | WP_011318254.1 | x |

### Actinobacteria and Nonsulfur Bacteria

|                    |                                   |                |   |
|--------------------|-----------------------------------|----------------|---|
| Streptomyces 11814 | Streptomyces albulus CCRC 11814   | WP_044371981.1 | x |
| Streptomyces au.   | Streptomyces auratus              | WP_006606736   | x |
| Kitasatospora      | Kitasatospora sp. NRRL B-11411    | WP_030458771.1 | x |
| Streptomyces a.    | Streptomyces albulus              | WP_016579310   | x |
| Streptomyces 337   | Streptomyces sp. NRRL S-337       | WP_051798467.1 | x |
| Streptomyces 1448  | Streptomyces sp. NRRL S-1448      | WP_037807924.1 | x |
| Herpetosiphon      | Herpetosiphon aurantiacus DSM 785 | ABX04514.1     |   |
| Ktedonobacter      | Ktedonobacter racemifer           | WP_007918812   |   |

|                    |                                       |                |
|--------------------|---------------------------------------|----------------|
| Thermogemmatispora | Thermogemmatispora<br>carboxidivorans | WP_052888153.1 |
|--------------------|---------------------------------------|----------------|

**Verrucomicrobia and  
Proteobacteria**

|                           |                                            |                |
|---------------------------|--------------------------------------------|----------------|
| Verrucomicrobium          | Verrucomicrobium spinosum                  | WP_009963469.1 |
| Verrucomicrobium BvORR034 | Verrucomicrobium sp. BvORR034              | WP_050027044.1 |
| Verrucomicrobium BvORR106 | Verrucomicrobium sp. BvORR106              | WP_038170772.1 |
| Haloferula                | Haloferula sp. BvORR071                    | WP_035603332.1 |
| Acetobacteraceae          | Acetobacteraceae bacterium AT-5844         | WP_007438300.1 |
| Bosea                     | Bosea sp. 117                              | WP_029352590.1 |
| Roseomonas                | Roseomonas gilardii                        | WP_051417580.1 |
| Opitutaceae               | Opitutaceae bacterium TAV1                 | WP_007361734.1 |
| Azospira                  | Azospira oryzae                            | WP_014236754.1 |
| Methylocystis             | Methylocystis parvus                       | WP_026016490.1 |
| Azotobacter c.            | Azotobacter chroococcum                    | WP_039805662.1 |
| Azotobacter v.            | Azotobacter vinelandii DJ                  | WP_012699882.1 |
| Novosphingobium           | Novosphingobium pentaromativorans<br>US6-1 | WP_041565053.1 |
| Pusillimonas              | Pusillimonas noertemannii                  | WP_040548591.1 |
| Alcaligenes               | Alcaligenes faecalis                       | WP_042482826.1 |
| Pseudomonas sp.           | Pseudomonas sp. LFM046                     | WP_044872130.1 |
| Pseudomonas r.            | Pseudomonas resinovorans                   | WP_028628539.1 |
| Pseudomonas p.            | Pseudomonas pseudoalcaligenes<br>KF707     | WP_003452025.1 |
| Pseudomonas a.            | Pseudomonas alcaligenes                    | WP_043244200.1 |
| Parvibaculum              | Parvibaculum lavamentivorans               | WP_011995292.1 |
| Polaromonas               | Polaromonas naphthalenivorans              | WP_049763759.1 |
| Advenella                 | Advenella mimigardefordensis DPN7          | WP_025373200.1 |
| Hydrogenophaga            | Hydrogenophaga sp. PBC                     | EIK91695.1     |

**Firmicutes and Euryarchaeota**

|                     |                                   |                |
|---------------------|-----------------------------------|----------------|
| Halovivax a.        | Halovivax asiaticus               | WP_007699127.1 |
| Halovivax r.        | Halovivax ruber                   | WP_015299795.1 |
| Halobiforma         | Halobiforma lacisalsi             | WP_007142116.1 |
| Natrialba           | Natrialba hulunbeirensis          | WP_006653595.1 |
| Haladaptatus        | Haladaptatus cibarius             | WP_049971073.1 |
| Halopiger           | Halopiger salifodinae             | WP_049989561.1 |
| Acidaminococcus D21 | Acidaminococcus sp. D21           | EEH91403       |
| Aerococcus          | Aerococcus viridans               | AAB36100       |
| Enterococcus 1      | Enterococcus faecium              | WP_002296473   |
| Enterococcus 2      | Enterococcus faecium              | WP_047929821.1 |
| Enterococcus 3      | Enterococcus pallens ATCC BAA-351 | WP_010759649.1 |
| Lactococcus         | Lactococcus garvieae              | WP_003134622.1 |

**Table S2: Catalytic efficiency of recombinant GOX and GOX-like proteins.**

| Enzyme               | Organism                         | Reference                             | K <sub>cat</sub> /K <sub>M</sub> (s <sup>-1</sup> mol <sup>-1</sup> l) |           |
|----------------------|----------------------------------|---------------------------------------|------------------------------------------------------------------------|-----------|
|                      |                                  |                                       | L-Lactate                                                              | Glycolate |
| N3-GOX               | Synthetic ancestral protein      | This study                            | 78                                                                     | 467       |
| No-LOX <sup>x</sup>  | <i>Nostoc</i> sp. PCC 7120       | Hackenberg <i>et al.</i> <sup>x</sup> | 2068707                                                                | 1413      |
| Cr-LOX <sup>x</sup>  | <i>Chlamydomonas reinhardtii</i> | Hackenberg <i>et al.</i> <sup>x</sup> | 904571                                                                 | 1047      |
| Cp-GOX <sup>c</sup>  | <i>Cyanophora paradoxa</i>       | This study                            | 5240                                                                   | 165418    |
| Cm-GOX <sup>y</sup>  | <i>Cyanidioschyzon merolae</i>   | Rademacher <i>et al.</i> <sup>y</sup> | 1534                                                                   | 12444     |
| Sp-GOX               | <i>Spirogyra pratensis</i>       | This study                            | 10399                                                                  | 199220    |
| At-GOX2 <sup>x</sup> | <i>Arabidopsis thaliana</i>      | Hackenberg <i>et al.</i> <sup>x</sup> | 13703                                                                  | 124398    |

<sup>x</sup> [30]; <sup>y</sup> [38]

**Table S3: Sequences of the used primer sequences.**

| Primer                                          | Sequence                                                             | Restriction enzyme          |
|-------------------------------------------------|----------------------------------------------------------------------|-----------------------------|
| CpGOXb_275_fw<br>CpGOXb_369_fw<br>CpGOXb_655_rv | TGGCCCCGACGGCGATGCAG<br>CTCGTGGTCGACCACCCCGC<br>ACGCGACGTACGCGGCGAGG | none                        |
| CpGOX_RV_5P<br>CpGOX_FW_5P                      | GACGAACCAGACGTTTCGGTACATGCACGATC<br>GTGCACAGGCAGCAGGTTATAAAGCACTGTGT | none                        |
| Spra-GOX-EcoRI-fw<br>Spra-GOX-XhoI-rv           | <u>GAATTC</u> ATGTCTTCAGAAGTCGTTA<br>CTCGAGTTAAAGACGAGCGGCCATT       | <i>EcoRI</i><br><i>XhoI</i> |

## Supplementary Figures

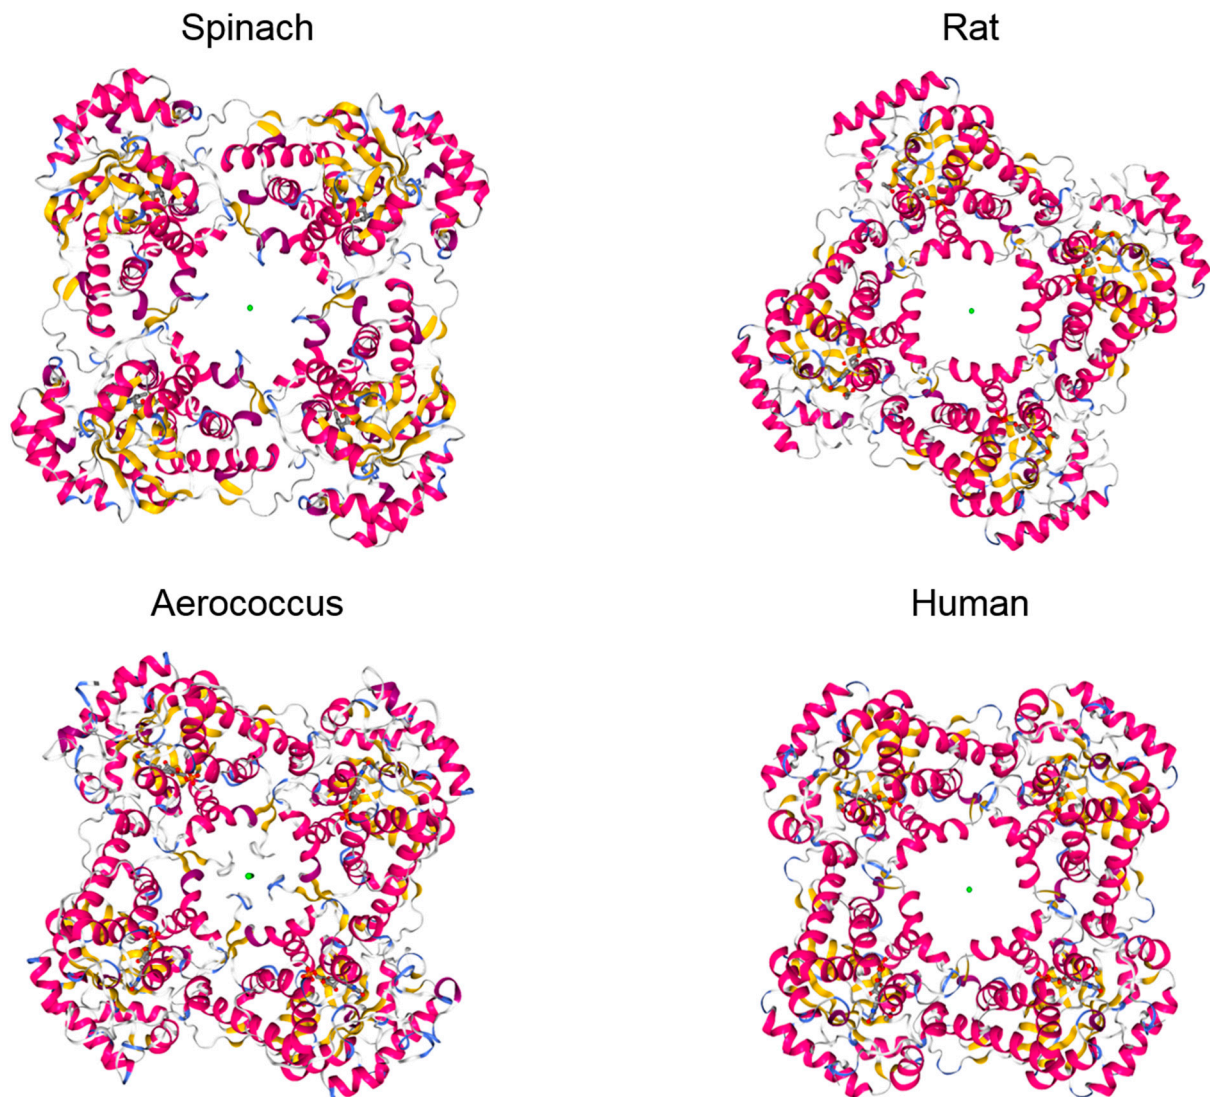

**Figure S1. GOX-like proteins from eukaryotes and prokaryotes with different substrate preferences share a common tertiary and quaternary structure.** Crystal structure of glycolate oxidase from spinach (1AL8) [28], long-chain hydroxyacid oxidase from rat (1TB39) [78] L-lactate oxidase from *Aerococcus* (2DU2) [79], and glycolate oxidase from human (2NZL). All proteins share the same quaternary structure build out of four identical subunits. Each subunit bound one FMN molecule. Protein structures were visualized using NGL-Viewer [80].

1 >Sp-GOX  
2 ATGTCCTTCAGAAGTCGTTAATGTCACAGAATTTTCAGGCGATCGCCAAACAGAAATTGCCCAAGCAGACTTATGATTATTATG  
3 CTTCTGGTGCTGAAGACGAATGGTCTCTTCGAGAAAACAGAAACGCATTTGAACGCATAACATTTTCGTCCTAGAATCTTGAT  
4 CGATGTAAGCAAAATAGATCTTACTACTTCAGTCTTAGGTTATCGACTTCCATGCCCATCATGGTTGCTCCTACTGCAATGC  
5 AAAAAATGGCTCATCCCGATGGTGAACCTTGCTACTGCTCGTGCTGCCACTTCCATGAACACAGCCATGACCCTATCTTCCTG  
6 GGCTACTAGCAGCGTCAAGAAGTGTCCAGCACTGGTCCAGGCCTGAGATTCTTCCAATATATGTGTATAAGAACAGAGA  
7 CGTAGTCTTACAGTTAGTGAGGAGAGCAGAGAAGGCAGGATTCAAAGCTATCGCCCTCACCGTCGATACTCCTAGACTAGG  
8 CAGGAGAGAGGCGGACATCAGAAACAAATTTGTTTTACCCCTGGGTTGACTTTGAAAAATTTTGAAGGATTGGATTTGGGG  
9 AAAATGGATCAGACTGAAGACTCGGGATTAGCATCCTACGTGGCAGGTCAAATCGACCGATCGCTCAGTTGGAAAGATGTA  
10 AAATGGCTTCAGAGCGTCACAAGCATGCCTATTTTGGTGAAGGGAGTTATCACTGGAGAAGATGCCAAGATTGCAGTAGAA  
11 TGCGGCGCATCTGGCATCATCGTGTCCAATCATGGAGCAAGGCAATTGGATTACGTGTCATCTACCATCAATGCATTGGAG  
12 GAAGTTGTGAAAGCGACAGCTGGCAGGATTCTGTGTTTTGGATGGGGGAGTGAGGAGAGGAACGGACGTACTIONAAAGC  
13 CTTAGCTTTGGGAGCCAAGGGAGTATTCGTGGGGAGACCTGTCGTATTTCGCTCTCGCTTCAGATGGAGAAGCAGGAGTGA  
14 AGAAGTGTGCAAATGTTGAGGGACGAGTTTCAAAGTGGCCATGGCTTTAGCAGGATGCACTAAAATCTCCGACATCAACA  
15 GAAGCTTGGTGCAGACGGAAGGAGACAGAATAAGAATGGCCGCTCGTCTTTAA

16 >Sp-GOX  
17 MSSEVVNVTEFQAIKQKLPKQTYDYYASGAEDEWSLRENRNAFERITFRPRILIDVSKIDLTTSVLGYRLSMPIMVAPTAMQKMA  
18 HPDGELATARAATSMNTAMTLSSWATSSVEEVSSTGPGLRFFQLYVYKNRDVVLQLVRRRAEKAGFKAIALTVDTPRLGRREADIR  
19 NKFVLPGLTLKNFEGLDLGKMDQTEDSGLASYVAGQIDRSLSWKDVKWLQSVTSMPILVKGVITGEDAKIAVECGASGIIVSNHG  
20 ARQLDYVSSSTINALEEVVKATAGRIPVFLDGGVRRGTDVLLKALALGAKGVFVGRPVVFFALASDGEAGVKKCLQMLRDEFELAMAL  
21 AGCTKISDINRSLVQTEGDRIRMAARL\*

22 **Figure S2. Sequence of the cDNA and protein of the GOX from *Spirogyra pratensis* used**  
23 **in this study.**

24 >gCp-GOX  
25 ATGCAGCCGCTGAGCGCGCAAGCGCTAGCCCAATACCGCGCCGACGCGCGATGGACCCCGTGAACGTGATGGAGTACC  
26 AGATGGTGGCGAAGGAGAAGCTGCCGAAGATGGTGTACGATTACTACGCGTCGGGCGCCGACGACCAAGTGGACTCTGCA  
27 GGAGGCGCGCTCGGCTTTCGAGCGGATCACCTCCGCGCGCGTGTCTGGACGTCTCCGTTCAGGATATGAGCACC  
28 ACCATCCTTGGCCAGAAGGTTCGCGTTCCCGATCTGCGTGGCCCCGACGCGGATGCAAGTGCATGGCCACCGGCCAGGGCG  
29 AGAAGGCGACCTCGCGCGCCGTGGCCTCGATGAACACCCTCATGACCCTTAGCTCGTGGTTCGACCACCCCGCTCGAGGA  
30 GGTGCCAAGGCGGCCCGCACGGCGCGCGTGGTTCAGCTCTACGTCTACAAGGACCGCGCATGCACCGAGCGCCTC  
31 GTCCGCGCGCCAGGCCCGCGCTACAAGGCTCTCTGCCTCAGGTCGACACCCCGCCTCGGCCCGCGTGAAC  
32 GACGTGAAGAACCGCTTCCACCTGCCGGACGGCTCACCATGGGCAACTTCCCTCGACCTCGTCCAGGCCGAGATGCCGA  
33 CTGACCAGAAGGACTCGGGCCTCGCCGCGTACGTGCGTCCCTCATCGACCCACCCCTCAACTGGAAGGACGTGAGTG  
34 GCTCAAGACCATACCAACCTGCCGATTGTCGTGAAGGGCGTGTGACGGCGGAGGACGCGCTGATGGCGGTGAAGCAC  
35 GGCTGCGCCGGCATCGTGTGTCGAACCAGGCGCGCGGACGCTGACTACAGCCCGGCGACCATCGACGTGCTCGAG  
36 GAGGTCGTCAACGCGGTCCGCGGCTACCCGATCGAGGTCTACCTCGACGGGGCGTCCGGAGGGGCGACCGACGCCCCTC  
37 AAGGCCCTCGCCCTCGGCGCCCGCGCGGTCTTCGTGGGGCGGCCGGTGGTGTGGGGCCTCGCGCGGGCGGCGAGGA  
38 GGGCGTGCAGAGGTGCTGACGATGCTGCGGGACGAGTTCAAGCTCGGCCCTCGCGCTGCTCGGCTGCCAGTCCCTCAAG  
39 GACATCAACCGCTCGATGGTCTCACCCCGCGGACCGCGCCAAGACCGCCGTCGCGCCCCGCTCTGA

40 >Cp-GOX  
41 ATGCAGCCGCTGAGCGCACAGGCACTGGCACAGTATCGTGCAGCAGCACCGATGGATCCGGTTAATGTTATGGAATATCA  
42 GATGGTGGCCAAAGAAAACTGCCGAAAATGGTGTATGATTATTATGCAAGCGGTGCAGATGATCAGTGGACCCTGCAAGA  
43 AGCACGTAGCGCATTTGAACGTATTACCTTTCGTCCGCGTGTTCGGTTGATGTTAGCGTTCAGGATATGAGCACCACCATT  
44 CTGGGTGAGAAAGTTGCATTTCCGATTTGTGTTGACCGACCGCAATGCAGTGTATGGCAACCGGTGAGGGTAAAAAGCA  
45 ACCAGCCGTGCAGTTGCAAGCATGAATACCCTGATGACCCTGAGCAGCTGGTCAACCACACCGCTGGAAGAAGTTGCAAA  
46 AGCCGCACCGCATGGTGCACGTTGGTTTCAGCTGTATGTTTATAAAGATCGTGCATGTACCGAACGTCTGGTTCGTCTGTC  
47 ACAGGCAGCAGTTATAAAGCACTGTGTCTGACCGTTGATACACCGCGTCTGGGTCTGCTGAAAATGATGTTAAAAATCG  
48 TTTTCATCTGCCGGATGGTCTGACCATGGGTAATTTCTGGATCTGGTTCAGGCAGAAATGCCGACCGATCAGAAAAGATAGT  
49 GGCCTGGCAGCCTATGTTGCAAGCCTGATTGATCCGACCCTGAATTGGAAAGATGTTGAATGGCTGAAAACCATACCAAT  
50 CTGCCGATTGTTGTTAAAGGTGTTCTGACAGCCGAAGATGCACTGATGGCAGTTAAACATGGTTGTCAGGTATTGTTGTGA  
51 GCAATCATGGTCCCCGTGAGCTGGATTATAGTCCGGCAACATTGATGTTCTGGAAGAGTTGTTAATGCAGTTCGTGGTT  
52 ATCCGATTGAAGTTTATCTGGATGGTGGTGTTCGTCGTGGCACCGATGCCCTGAAAGCACTGGCCCTGGGTGCACGTGCC  
53 GTTTTTGTTGGTCTCGCGTTGTTTGGGGACTGGCAGCCGGTGGTGAAGAAGGTGTTCTGTAAGTTCTGACAATGCTGCGT  
54 GATGAATTTAACTGGGTCTGGCACTGCTGGGTTGTCAGAGCCTGAAAGATATCAATCGTAGCATGGTTGTTACACCGGCA  
55 GATCGTGCCAAAACCGCAGTGCCTGCCCGTCTGTAA

56 >Cp-GOX  
57 MQPLSAQALAQYRAAAPMDPVNVMYQMVAKELPKMVMYDYYASGADDQWTLQEARSAFERITFRPRVLVDVSVQDMSTTILG  
58 QKVAFPICVAPTAMQCMATGQGEKATSRVASMNTLMTLSSWSTTPLEEVAKAAPHGARWFQLYVYKDRACERLVRRAQAA  
59 GYKALCLTVDTPRLGRRENDVKNRFHLPDGLTMGNFLDLVQAEMPTDQKDSGLAAYVASLIDPTLNWKDVEWLKTTITNLPVVKG  
60 VLTAEALMAVKHGCAGIVVSNHGARQLDYSPATIDVLEEVNAVRYPIEVYLDGGVRRGTDALKALALGARAVFVGRPVVWG  
61 LAAGGEEGVRKVLTMLRDEFKLLGLALLGCQSLKIDINRSMVTPADRAKTA VRARL\*

62  
63 **Figure S3. Corrected sequence of the Cp-GOX coding gene in *Cyanophora paradoxa***  
64 **(the underlined nucleotides represent the miss-annotated intron; upper panel), the**  
65 **codon-optimized cDNA and protein used in this study.** The codon usage was optimized  
66 referring to the used overexpressing system *E. coli*.

67  
68  
69

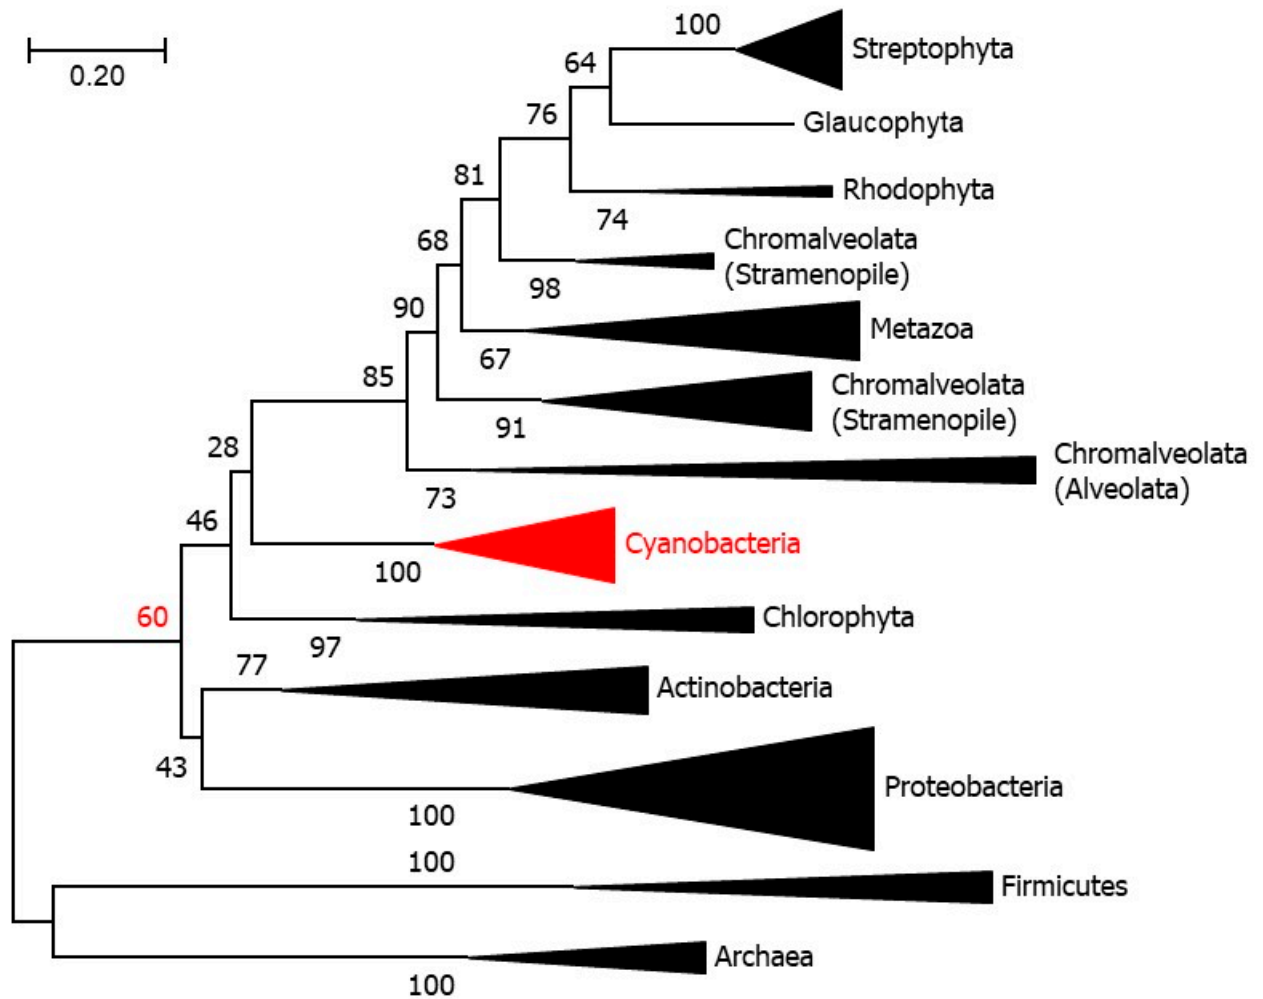

71

72 **Figure S4. Collapsed phylogenetic tree of GOX-like proteins based on 111 amino acid**  
 73 **sequences from all organismic groups in the tree of life.** The phylogeny was implemented  
 74 using Maximum likelihood and the LG substitution model assuming an estimated proportion of  
 75 invariant sites and a gamma distribution. Bootstrap values were inferred from 1000 replicates.  
 76 The species names and accession numbers of GOX-like proteins are listed in the  
 77 Supplementary Material 1, table S1.

78

79

80



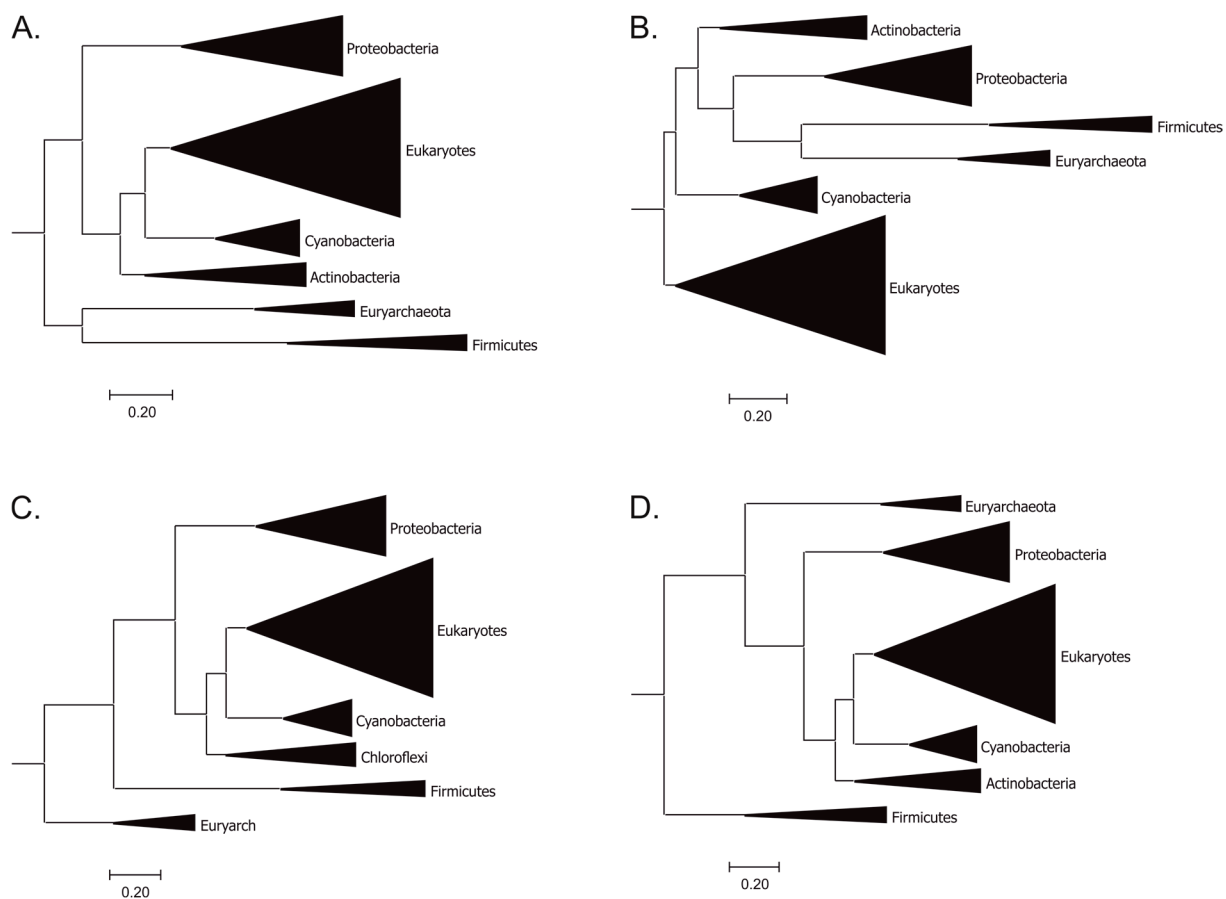

81

82 **Figure S5. Alternative rooting of phylogenetic trees of GOX- and LOX-like sequences.**

83 For details see Figure 2. (A) Midpoint rooted tree. The root is placed between the branch of  
 84 Euryarchaeota and Firmicutes and the remaining clusters (as in Figure 1). (B) The root is  
 85 placed between Eukaryotes and the other clusters (as in [32]). (C) The root is placed between  
 86 the branch of Archaea and the other clusters. (D) The root is placed between the branch of  
 87 Firmicutes and the other clusters.

>N3-GOX

MNVMEYQALAKEKLPKMVYDYYASGADDQWTLQENRFAFERIRFRPRVLVDVSKQDLSTTILGQPVSFPIMVAPTAMQCM AHP  
EGELATARAAAASAGTIMTLSSWSTTSLEDVAAAAGPRWFQLYVYKDRATERLVRRAEAAGYRALCLTVDT PRLGRREADIRNR  
FHLPPGLTLANFADLALEMPEQQGDSGLAAYVASLIDPSLSWKDVEWLK SITSPLIVVKGVLTAEDAQMAVQHGAAGIIVSNHGAR  
QLDYAPATIDALEEVVKAVRGRVEVFLDGGVRRGTDVLKALALGARAVFVGRPVVWGLAVGGEEGVRKVL SMLRDEFELAMAL  
CGCQKLS DINRSMVL\*

>N3-GOX

ATGAACGTTATGGAATATCAGGCACTGGCAAAAAGAAAACTGCCGAAAATGGTGTATGATTATTATGCAAGCGGTGCAGATG  
ATCAGTGGACCCTGCAAGAAAATCGTAGCGCATTTGAACGTATTCGTTTTCGTCCGCGTGTCTGGTTGATGTTAGCAAACA  
GGATCTGAGCACCACCATTCTGGGTCAGCCGGTTAGCTTTCCGATTATGGTTGCACCGACCGCAATGCAGTGTATGGCACA  
TCCGGAAGGTGAACTGGCAACCGCACGTGCAGCAGCAAGCGCAGGCACCATTATGACCCTGAGCAGCTGGTCAACCACCA  
GTCTGGAAGATGTTGCAGCAGCCGCAGGTCCGCGTTGGTTTCAGCTGTATGTTTATAAAGATCGTGCAGTTACCGAACGTC  
TGGTTCGTCGTGCCGAAGCAGCAGGTTATCGTGCAGTGTGTCTGACCGTTGATACACCGCGTCTGGGTCGCCGTGAAGCA  
GATATTCGTAATCGTTTTTCATCTGCCTCCGGGTCTGACCCTGGCAAATTTTGCAGATCTGGCACTGGAATGCCGGAACAG  
CAGGGTGATAGCGGTCTGGCAGCATATGTTGCAAGCCTGATTGATCCGAGCCTGAGCTGGAAAGATGTGGAATGGCTGAA  
AAGCATTACCAGCCTGCCGATTGTTGTTAAAGGTGTTCTGACAGCCGAAGATGCACAGATGGCAGTTCAGCATGGTGCAGC  
AGGTATTATTGTTAGCAATCATGGTGCACGTGAGCTGGATTATGCACCGGCAACCATTGATGCACTGGAAGAAGTTGTGAAA  
GCAGTTCGTGGTTCGTGTTGAAGTTTTCTGGATGGTGGTGTGCGTCGTGGCACCAGTGTCTGAAAGCACTGGCCCTGGG  
TGCACGTGCCGTTTTTTGTTGGTCCGTTGTTTGGGGTCTGGCCGTTGGTGGTGAAGAAGGTGTTTCGTAAGTTCTGAG  
CATGCTGCGTGATGAATTTGAACTGGCCATGGCACTGTGTGGTTGTCAGAAACTGAGCGATATTAATCGTAGCATGGTCT  
GTAA

**Figure S6. Sequence of the protein and the codon-optimized DNA of the ancestral GOX-like protein (N3-GOX) used in this study.** The codon usage was optimized referring to the used overexpressing system *E. coli*.

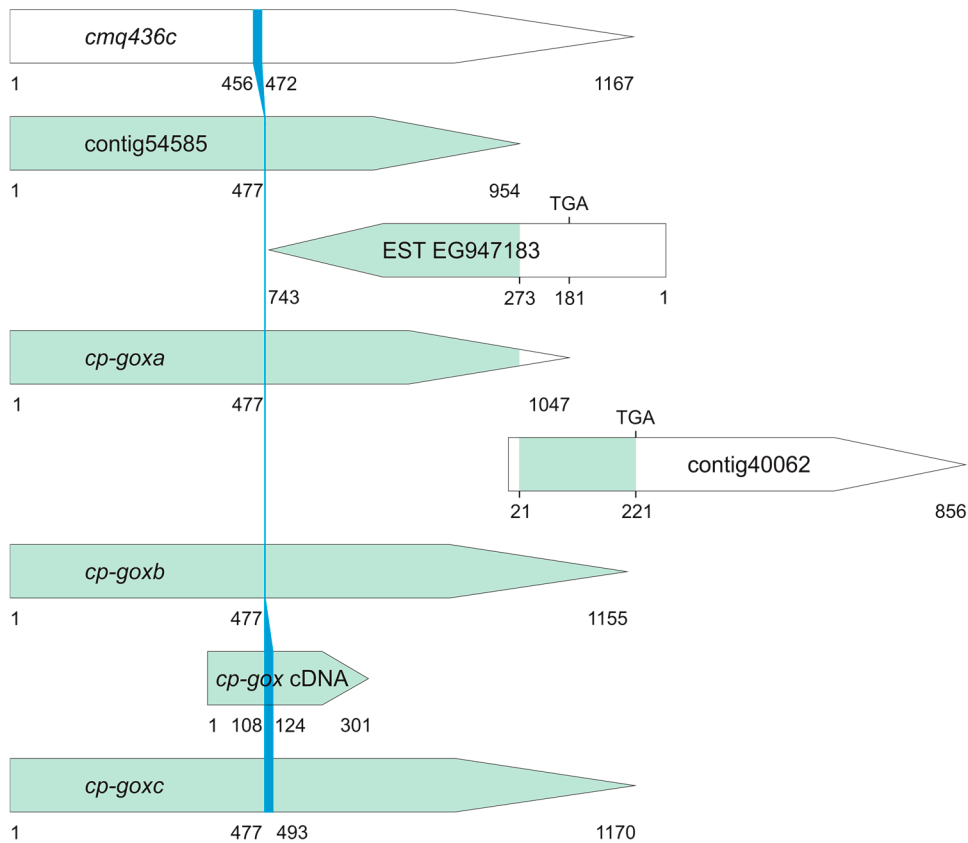

**Figure S7. Schematic display of the work to obtain the correct complete *cp-goxc* gene from *Cyanophora paradoxa*.** The genomic contig54585 from *Cyanophora* was assumed to encode for the Cp-GOX protein [21]. Homology analysis with the *gox* gene from *Cyaniodischyzon merolae* (*cmq436c*) revealed a missing C-terminus. Subsequent BLAST analyses with contig54585 showed high sequence similarity (~ 100 %) with an EST clone derived from *Cyanophora* cDNA (EST EG947183) containing the missing part for the C-terminus. The completed gene (*cp-goxa*) was cloned and used for production of recombinant protein, which, however, did not show enzymatic activity. A deeper look into the *Cyanophora* genome contigs identified the contig40062, which harbors a partial sequence (200 bp) showing high sequence similarity to the CMQ436C C-terminus. Subsequently, the two non-overlapping contigs were linked. The newly obtained fused gene sequence (*cp-goxb*) corresponds well with the homologues gene *cmq436c*. However, overexpressing the Cp-GOXb protein again resulted in an inactive enzyme. Further analyses amplifying cDNA from the *cp-goxc* gene resulted in 301 bp fragment (*cp-goxcDNA*), which resulted in the discovery of a mis-annotation of the *gox* gene on contig54585. Congruent to the *cmq436c* gene, the newly obtained cDNA fragment shows a 15 bp insertion (blue), which seems to be crucial to encode a functional Cp-GOX protein. The 15 bp insert was included into the *cp-goxb* and the product was named *cp-goxc*. The final gene was overexpressed in *E. coli* resulting in enzymatic active Cp-GOX. Green parts show high sequence similarity with the *cmq436c* gene.

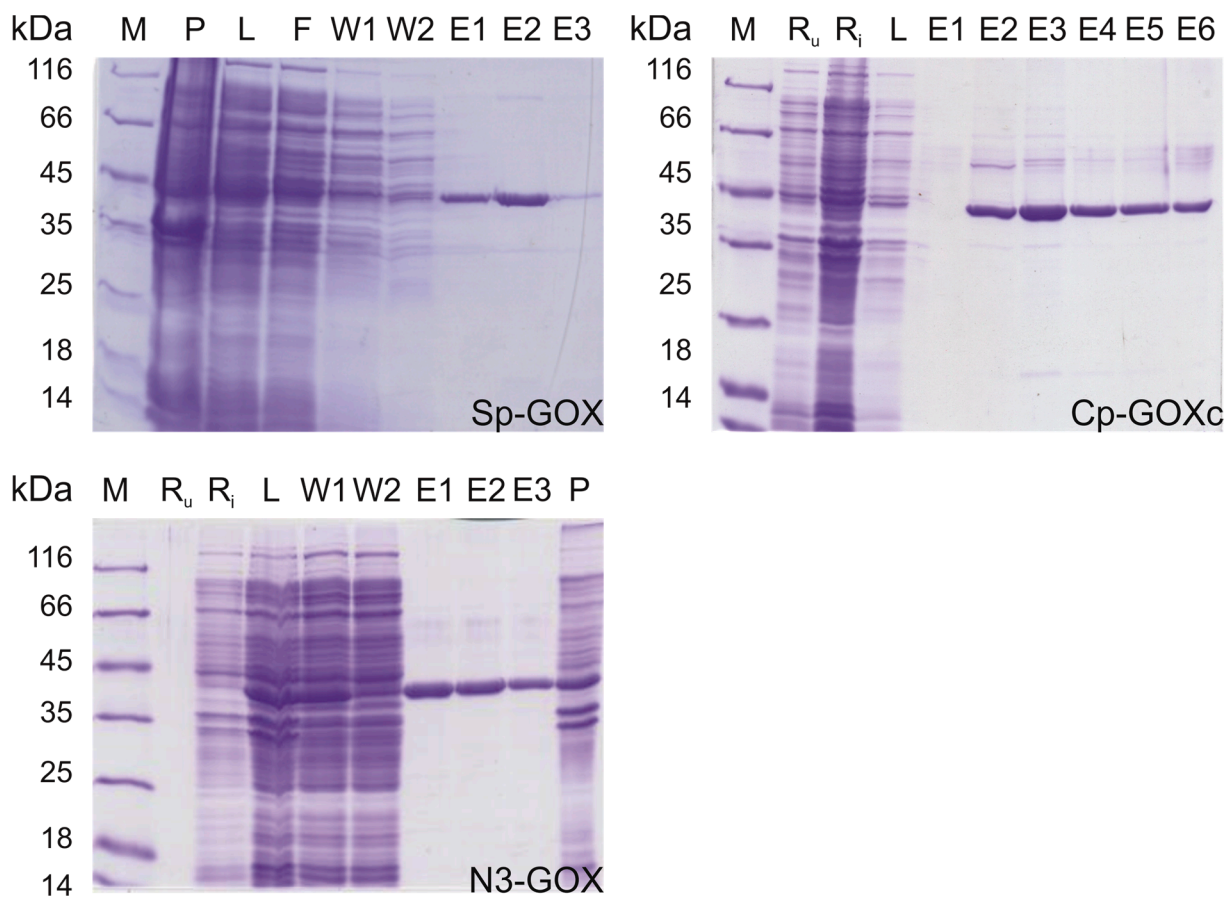

**Figure S8. Purification of recombinant GOX proteins from *Spirogyra* (Sp-GOX) and *Cyanophora* (Cp-GOXc) and the ancestral GOX protein (N3-GOX).** The coding sequence of the overexpressed proteins were cloned into pASG-IBA43plus and purified using the fused His- or Strep-tag. Proteins were separated by SDS-Page and stained using Coomassie brilliant blue. For enzyme assays, the elution fractions were combined and re-buffered. M, Molecular mass standard (Broad Range, Bio-Rad); P, suspended pellet after cell disruption and centrifugation; R<sub>u</sub>, Crude extract from non-induced *E. coli* culture; R<sub>i</sub>, Crude extract from induced *E. coli* culture; L, Cell-free protein lysate; F, Flow-through of protein extracts; W1 and W2, Washing flow-through; E1 - E6, Elution fractions.

## References

78. Cunane, L.M.; Barton, J.D.; Chen, Z.-w.; Lê, K.H.D.; Amar, D.; Lederer, F.; Mathews, F.S. Crystal Structure Analysis of recombinant rat kidney long chain hydroxy acid oxidase. *Biochemistry-US* **2005**, *44*, 1521–1531.
79. Umena, Y.; Yorita, K.; Matsuoka, T.; Kita, A.; Fukui, K.; Morimoto, Y. The crystal structure of L-lactate oxidase from *Aerococcus viridans* at 2.1Å resolution reveals the mechanism of strict substrate recognition. *Biochem. Biophys. Res. Commun.* **2006**, *350*, 249–256.
80. Rose, A.S.; Hildebrand, P.W. NGL Viewer: A web application for molecular visualization. *Nucleic Acids Res.* **2015**, *43*, W576–W579.
